# Supplementary material
Source: PubMed Central journal article supplement (PMC3798070)

CD signal at 220 nm

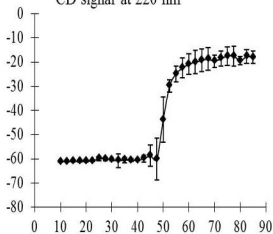

CD signal at 262 nm

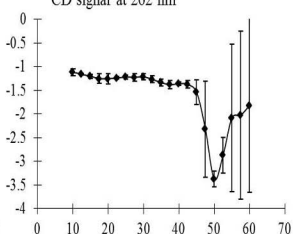

CD signal at 269 nm

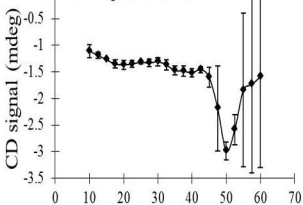

CD signal at 284 nm

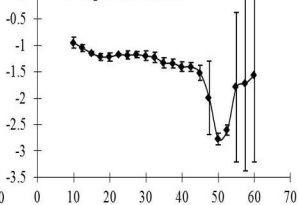

CD signal at 291 nm

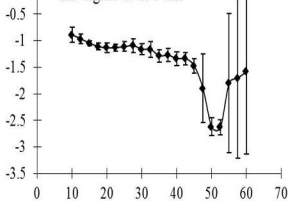

Temperature (°C)

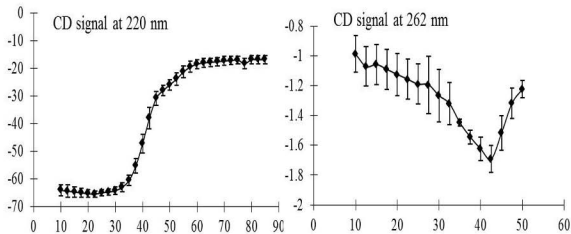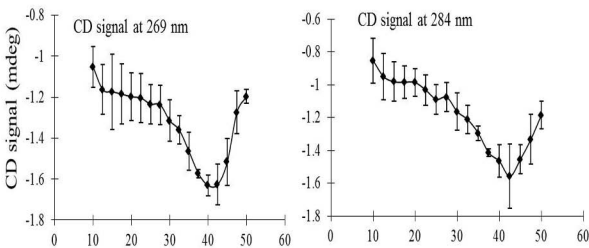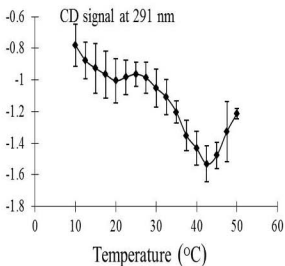

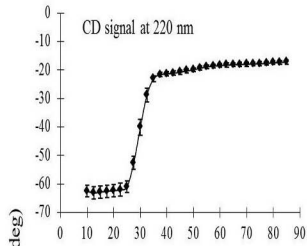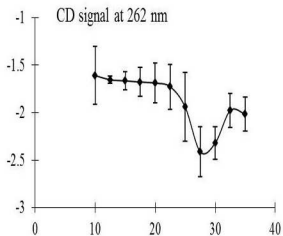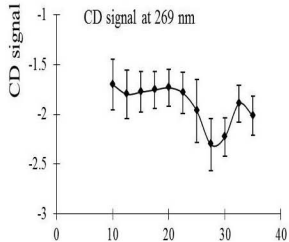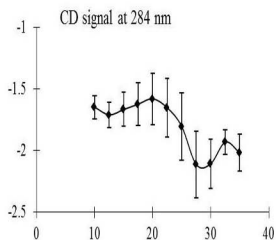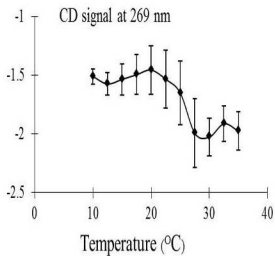

Supplement: NIHMS509749-supplement-Supp_Fig_S1-S3.pdf [file NIHMS509749-supplement-Supp_Fig_S1-S3.pdf]
